# Supplementary material
Source: PubMed Central journal article supplement (PMC6727685)
Supplement: jamasurg-154-e193348-s001.pdf [file jamasurg-154-e193348-s001.pdf]

## Supplementary Online Content

Tung S, Davis LE, Hallet J, et al; Pancreas Cancer Population Outcomes Research Group. Population-level symptom assessment following pancreaticoduodenectomy for adenocarcinoma. *JAMA Surg*. Published online September 4, 2019.  
doi:10.1001/jamasurg.2019.3348

**eTable 1.** OHIP and CIHI cods

**eTable 2.** Characteristics of pancreatic adenocarcinoma patients undergoing pancreaticoduodenectomy, stratified by recording of ESAS in the twelve months following surgery

**eFigure 1.** Proportion of patients undergoing surgery with adjuvant chemotherapy (N=410) and undergoing surgery alone (N=122) reporting at least one moderate-to-severe ESAS score ( $\geq 4$ ) following surgery

**eFigure 2.** Proportion of patients undergoing surgery with adjuvant chemotherapy (A) and undergoing surgery alone (B) reporting moderate-to-severe ESAS scores ( $\geq 4$ ) for all symptoms

This supplementary material has been provided by the authors to give readers additional information about their work.

**eTable 1: OHIP and CIHI codes**

|                                | <b>Database</b> | <b>Codes</b>                                                                                                                                                                                                                                                  |
|--------------------------------|-----------------|---------------------------------------------------------------------------------------------------------------------------------------------------------------------------------------------------------------------------------------------------------------|
| <b>Pancreatic Cancer</b>       | <i>OCR</i>      | 8000, 8001, 8010, 8020, 8021, 8031, 8035, 8140, 8144, 8145, 8255, 8340, 8341, 8344, 8440, 8442, 8470, 8481, 8490, 8500, 8560, 8570, 8574, 8575, 9990                                                                                                          |
| <b>Pancreaticoduodenectomy</b> | <i>CIHI</i>     | 1.OK.87.^, 1.OK.91.^                                                                                                                                                                                                                                          |
| <b>Receipt of Chemotherapy</b> | <i>OHIP</i>     | G381, G281, G339, G345, G359.                                                                                                                                                                                                                                 |
| <b>Receipt of Radiation</b>    | <i>ALR</i>      | 120, 130, 503, 510, 511, 512, 519, 520, 521, 522, 523, 524, 525, 526, 527, 528, 529, 530, 531, 532, 533, 534, 535, 536, 537, 538, 539, 540, 541, 542, 548, 549, 561, 563, 565, 566, 568, 570, 571, 572, 573, 574, 575, 581, 582, 590, 591, 592, 594, 596, 597 |

**eTable 2: Characteristics of pancreatic adenocarcinoma patients undergoing pancreaticoduodenectomy, stratified by recording of ESAS in the twelve months following surgery.**

| CHARACTERISTIC                       | No ESAS<br>N=89 | ≥1 ESAS<br>N=615 | p-Value |
|--------------------------------------|-----------------|------------------|---------|
| <b>PATIENT DEMOGRAPHICS</b>          |                 |                  |         |
| <b>Age category (years old)</b>      |                 |                  |         |
| <55                                  | 15 (12.4%)      | 106 (87.6%)      | 0.009   |
| 55-64                                | 24 (11.2%)      | 190 (88.8%)      |         |
| 65-74                                | 25 (10.3%)      | 217 (89.7%)      |         |
| 75+                                  | 25 (19.7%)      | 102 (80.3%)      |         |
| <b>Sex</b>                           |                 |                  |         |
| Female                               | 49 (14.7%)      | 285 (85.3%)      | 0.12    |
| Male                                 | 40 (10.8%)      | 330 (89.2%)      |         |
| <b>Income Quintile</b>               |                 |                  |         |
| 1 <sup>st</sup> (lowest)             | 13 (12.1%)      | 94 (87.9%)       | 0.70    |
| 2 <sup>nd</sup>                      | 15 (10.5%)      | 128 (89.5%)      |         |
| 3 <sup>rd</sup>                      | 18 (11.6%)      | 137 (88.4%)      |         |
| 4 <sup>th</sup>                      | 18 (12.7%)      | 124 (87.3%)      |         |
| 5 <sup>th</sup> (highest)            | 25 (16.2%)      | 129 (83.8%)      |         |
| <b>Residence</b>                     |                 |                  |         |
| Urban                                | 80 (12.9%)      | 540 (87.1%)      | 0.57    |
| Rural                                | 9 (10.7%)       | 75 (89.3%)       |         |
| <b>Immigration status</b>            |                 |                  |         |
| Non-immigrants                       | 80 (12.1%)      | 581 (87.9%)      | <.001   |
| Immigrants                           | 9 (20.9%)       | 34 (79.1%)       |         |
| <b>Comorbidity burden</b>            |                 |                  |         |
| Low (ADG <10)                        | 51 (13.1%)      | 339 (87.7%)      | 0.91    |
| High (ADG ≥10)                       | 38 (12.1%)      | 276 (87.9%)      |         |
| <b>DISEASE AND TREATMENT FACTORS</b> |                 |                  |         |
| <b>Year of surgery</b>               |                 |                  |         |
| 2009-2012                            | 18 (5.8%)       | 290 (94.2%)      | 0.021   |
| 2013-2016                            | 71 (17.9%)      | 325 (82.1%)      |         |
| <b>Treatment course</b>              |                 |                  |         |
| No adjuvant therapy                  | 34 (21.8%)      | 122 (78.2%)      | <.001   |
| Adjuvant chemotherapy                | 49 (10.7%)      | 410 (89.3%)      |         |
| Adjuvant chemoradiation              | 6 (6.7%)        | 83 (93.3%)       |         |

Values are N(%) showing row percent.

Abbreviations: ESAS: Edmonton Symptom Assessment Scale; SD: Standard Deviation; ADG: Aggregate Diagnosis Group

**eFigure 1: Proportion of patients undergoing surgery with adjuvant chemotherapy (N=410) and undergoing surgery alone (N=122) reporting at least one moderate-to-severe ESAS score ( $\geq 4$ ) following surgery**

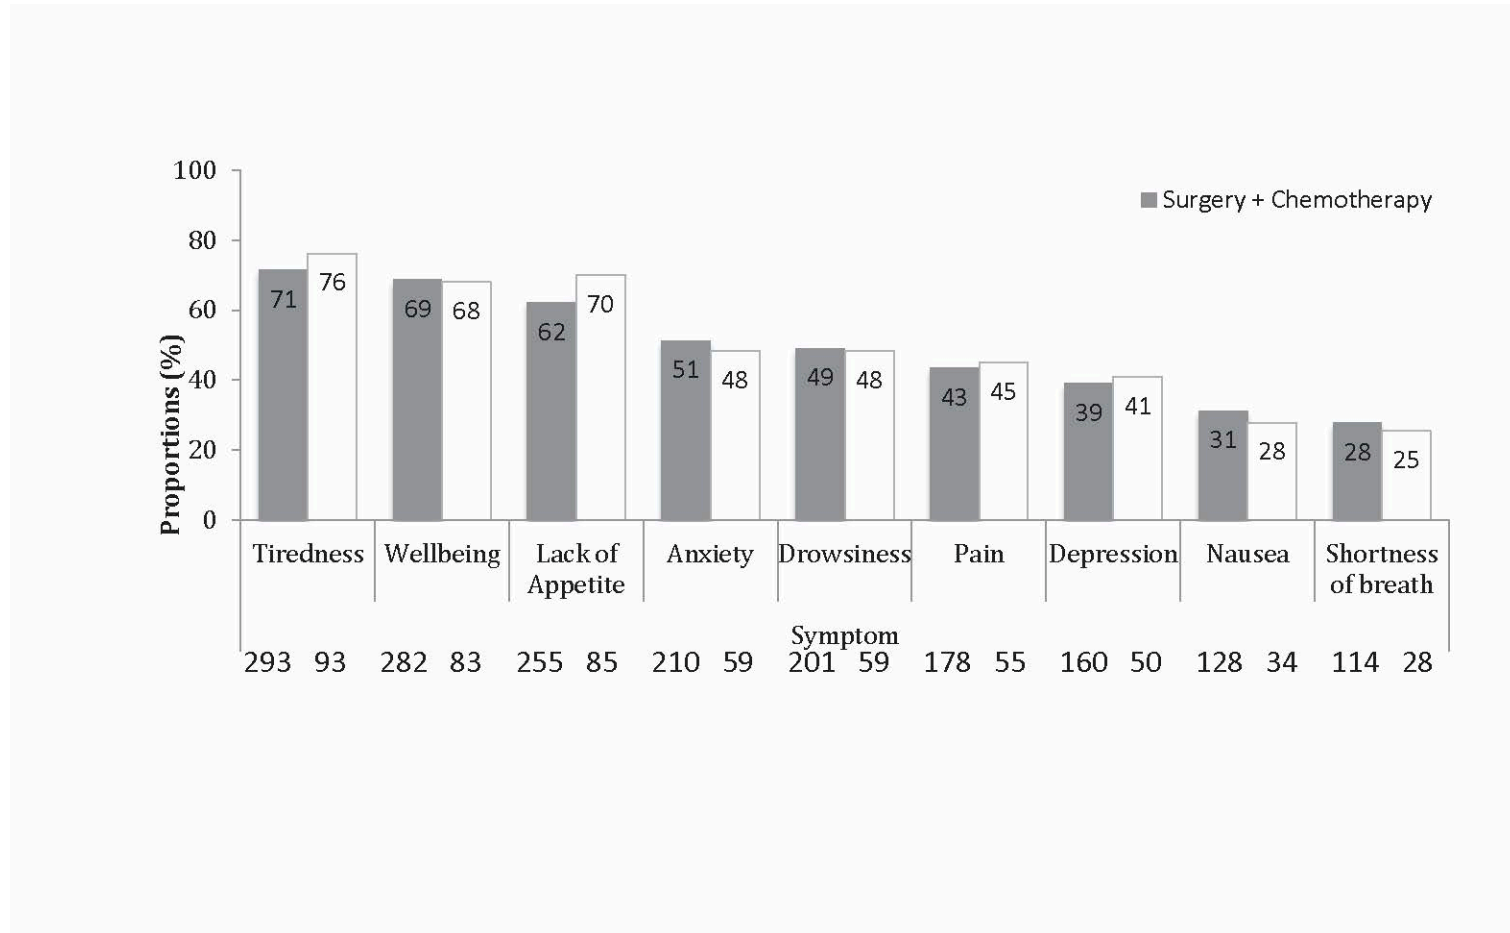

Numbers under the x-axis indicate the total number of patients reporting at least one moderate-to-severe ESAS score for each symptom, while numbers within bars represent proportion (%) of patients within cohort reporting at least one moderate-to-severe ESAS score for each symptom.

**eFigure 2: Proportion of patients undergoing surgery with adjuvant chemotherapy (A) and undergoing surgery alone (B) reporting moderate-to-severe ESAS scores ( $\geq 4$ ) for all symptoms**

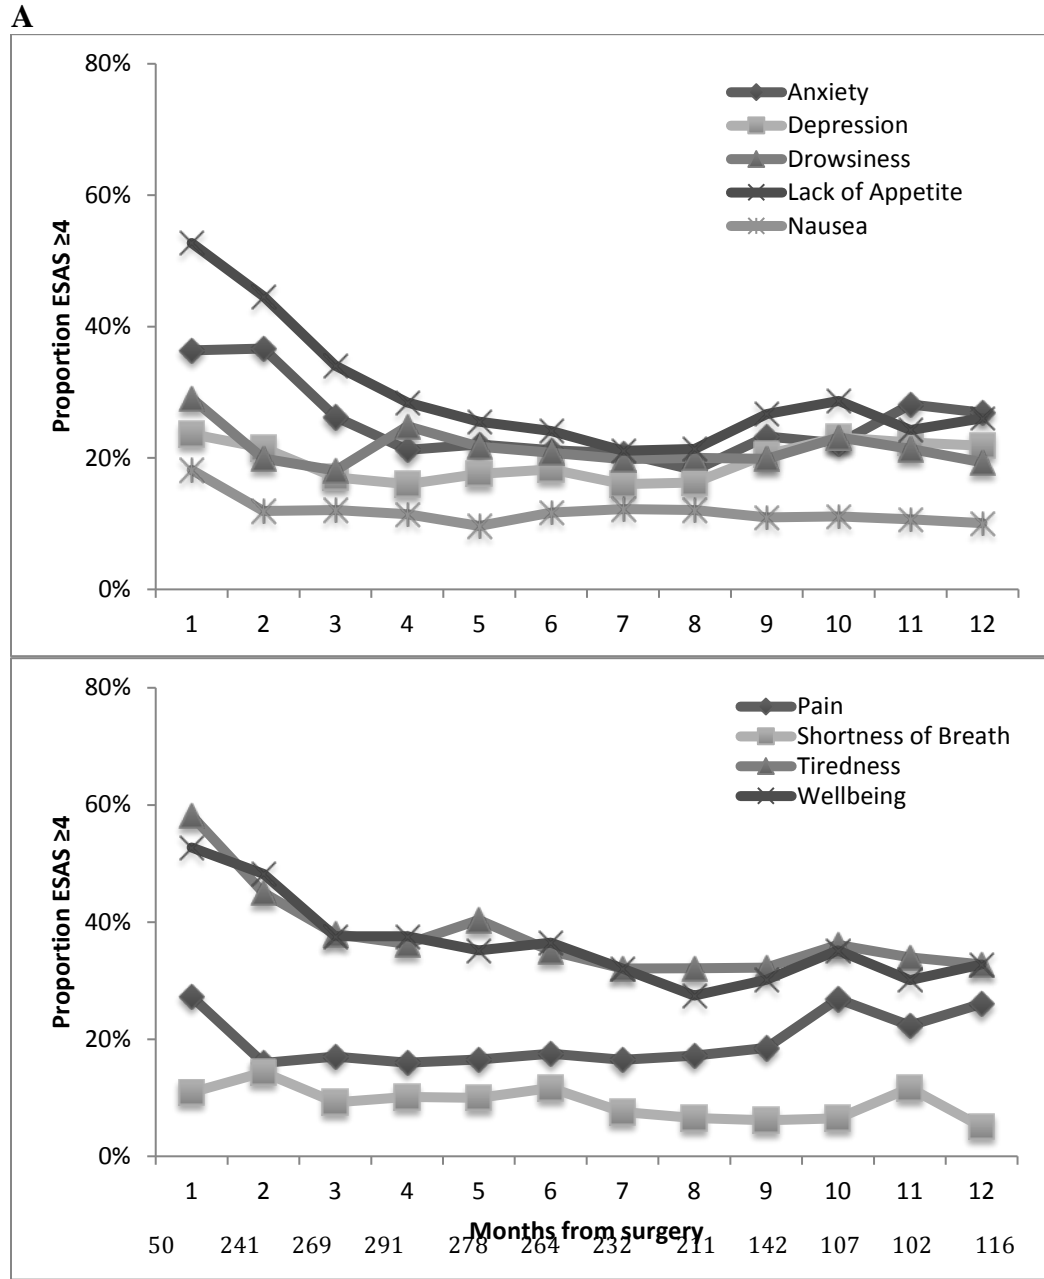

**B**

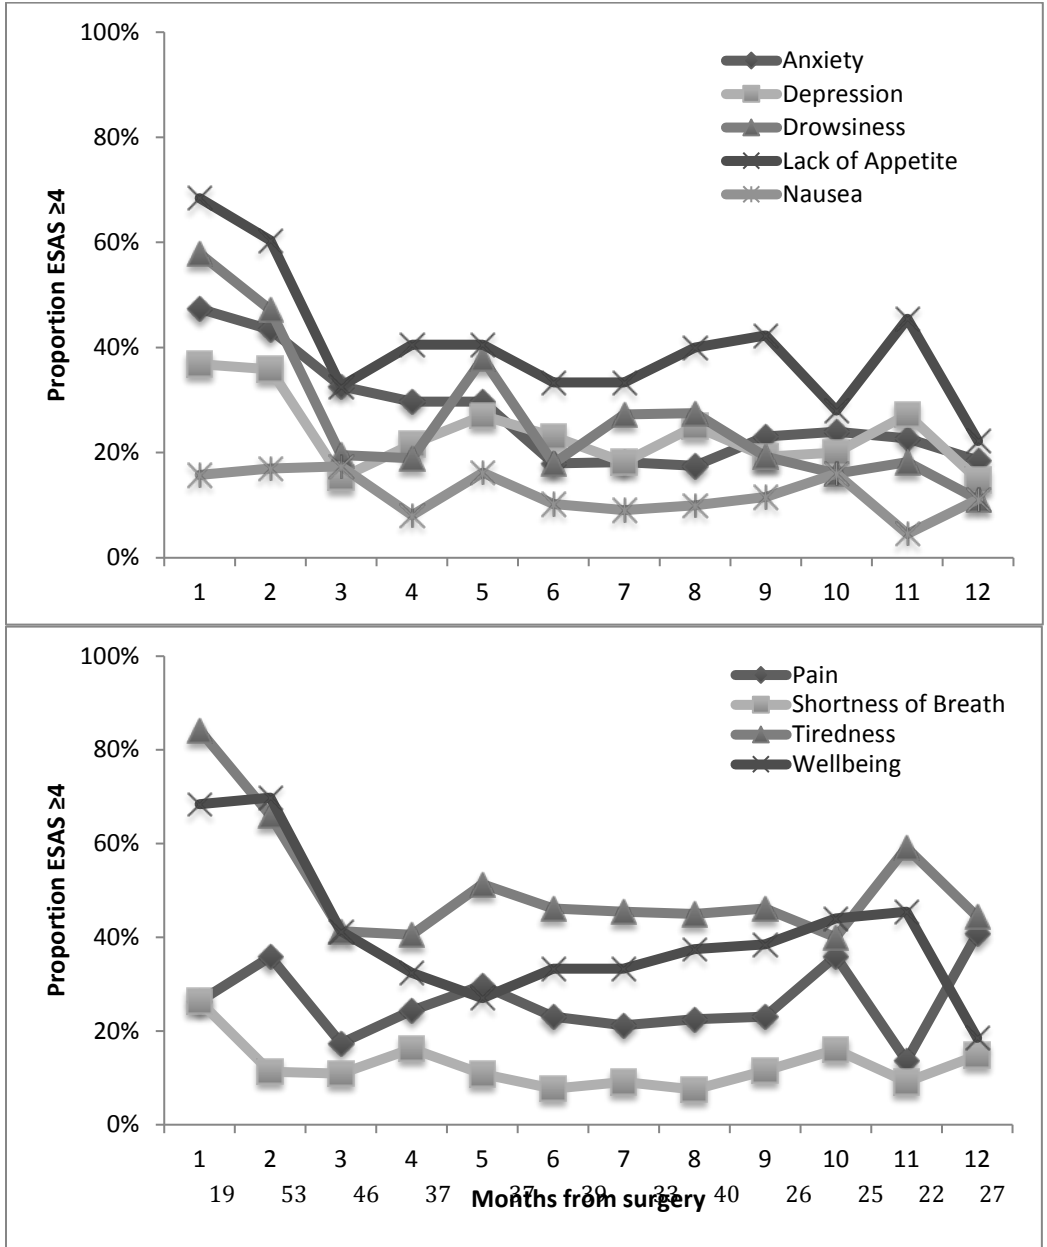

Trendlines facilitate visualization of trends over time but do not represent continuous data. Numbers under the x-axis indicate the denominator for each month.
